# Supplementary material
Source: PubMed Central journal article supplement (PMC1937568)

**Dapi**

**22C10**

**Control**

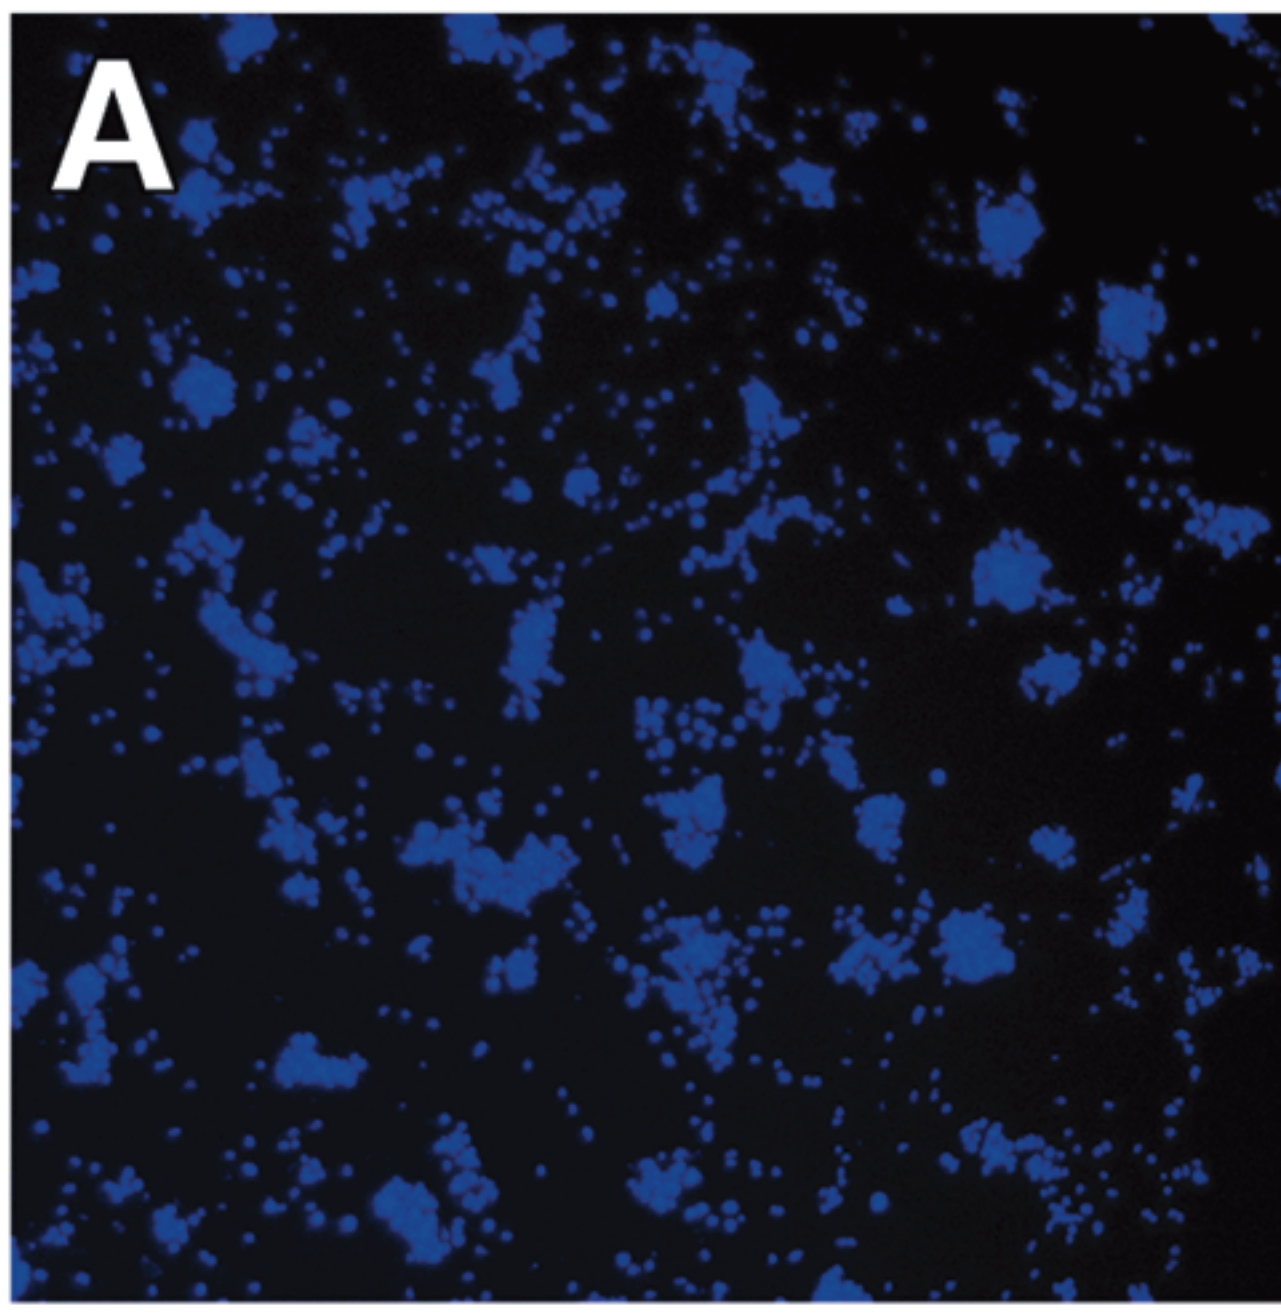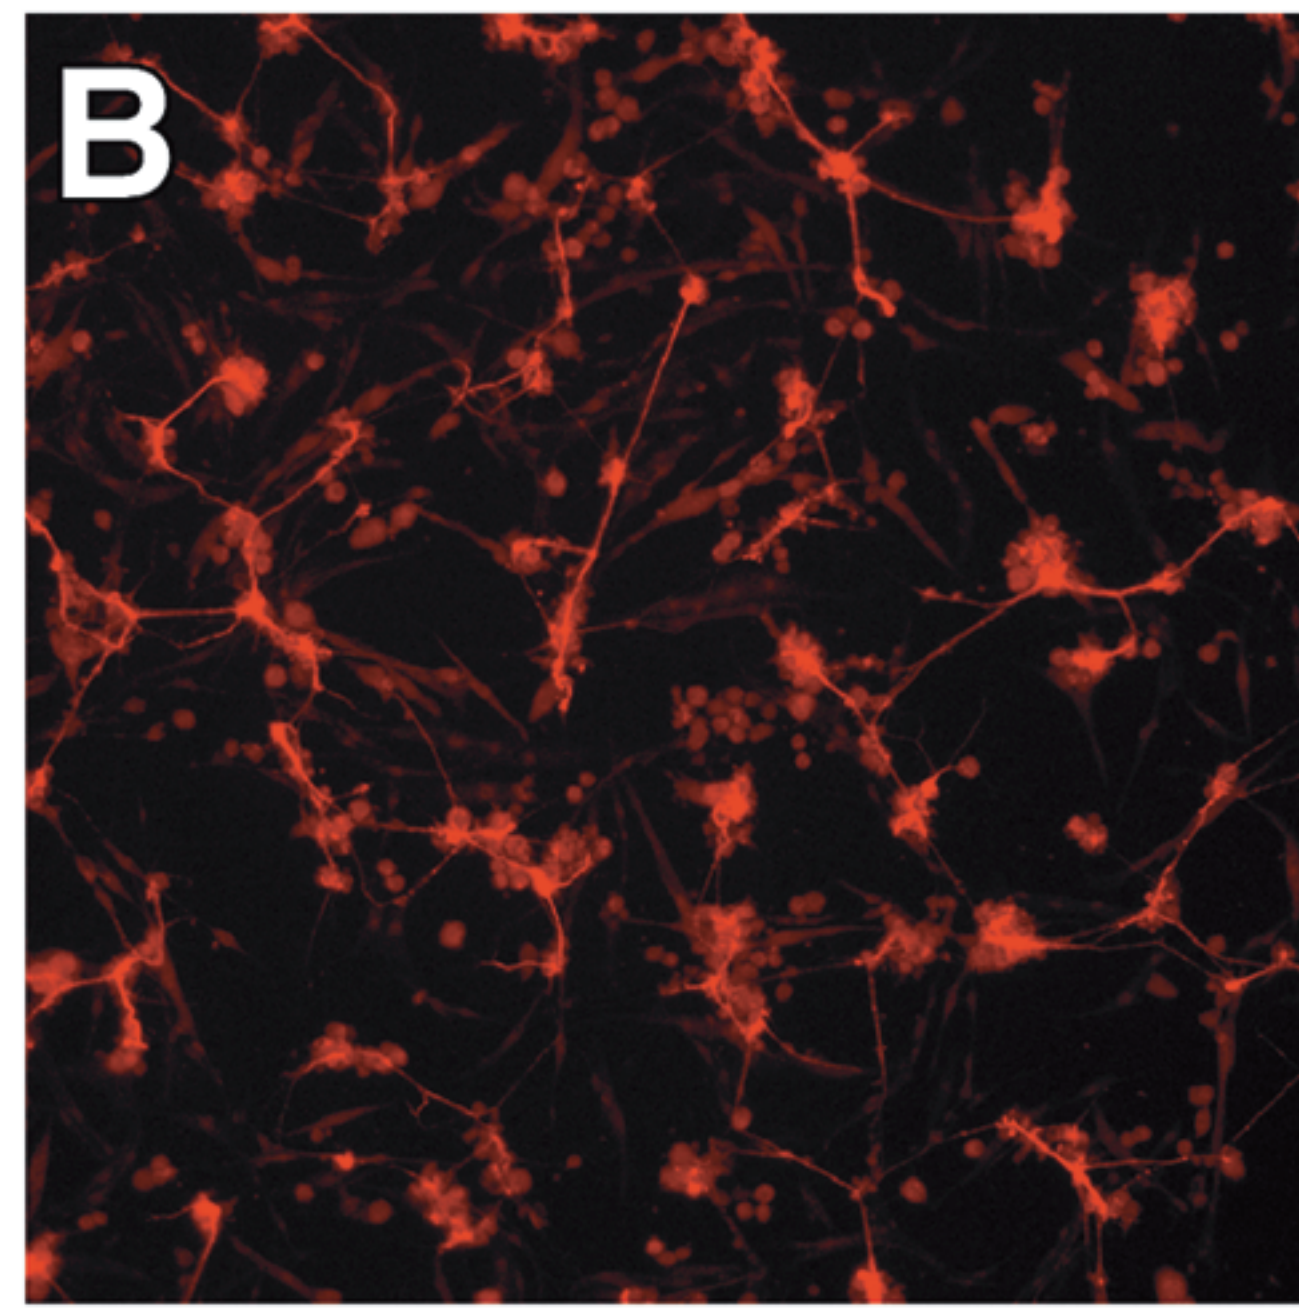

**Sox-N**

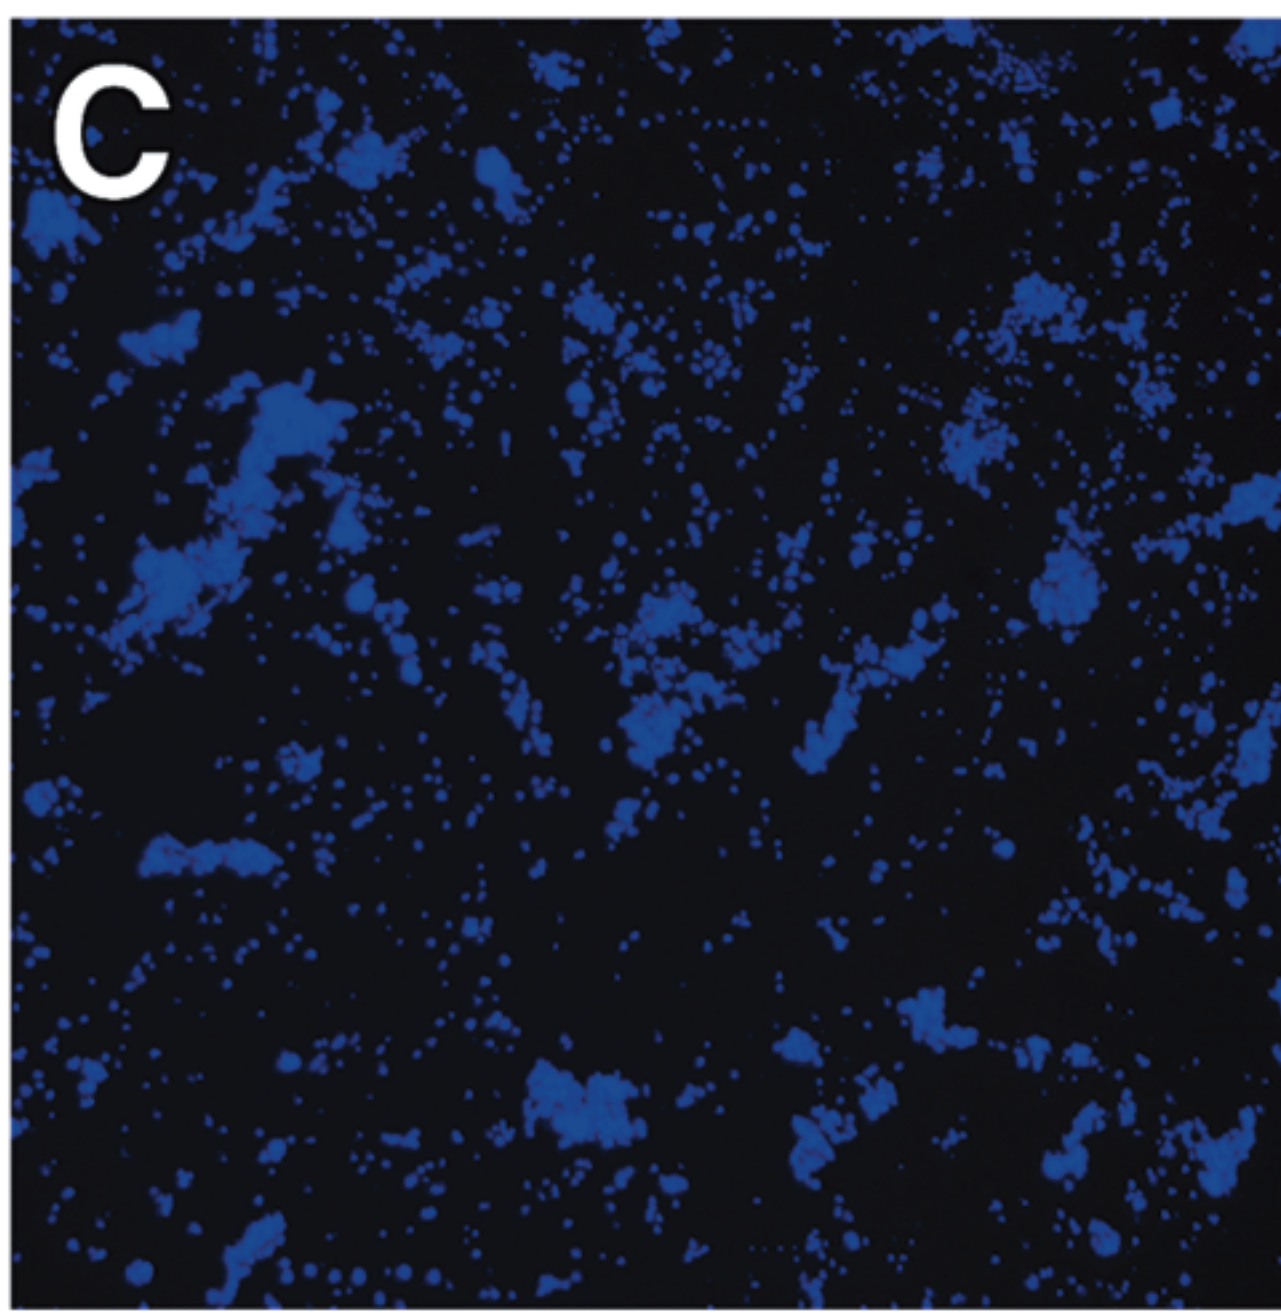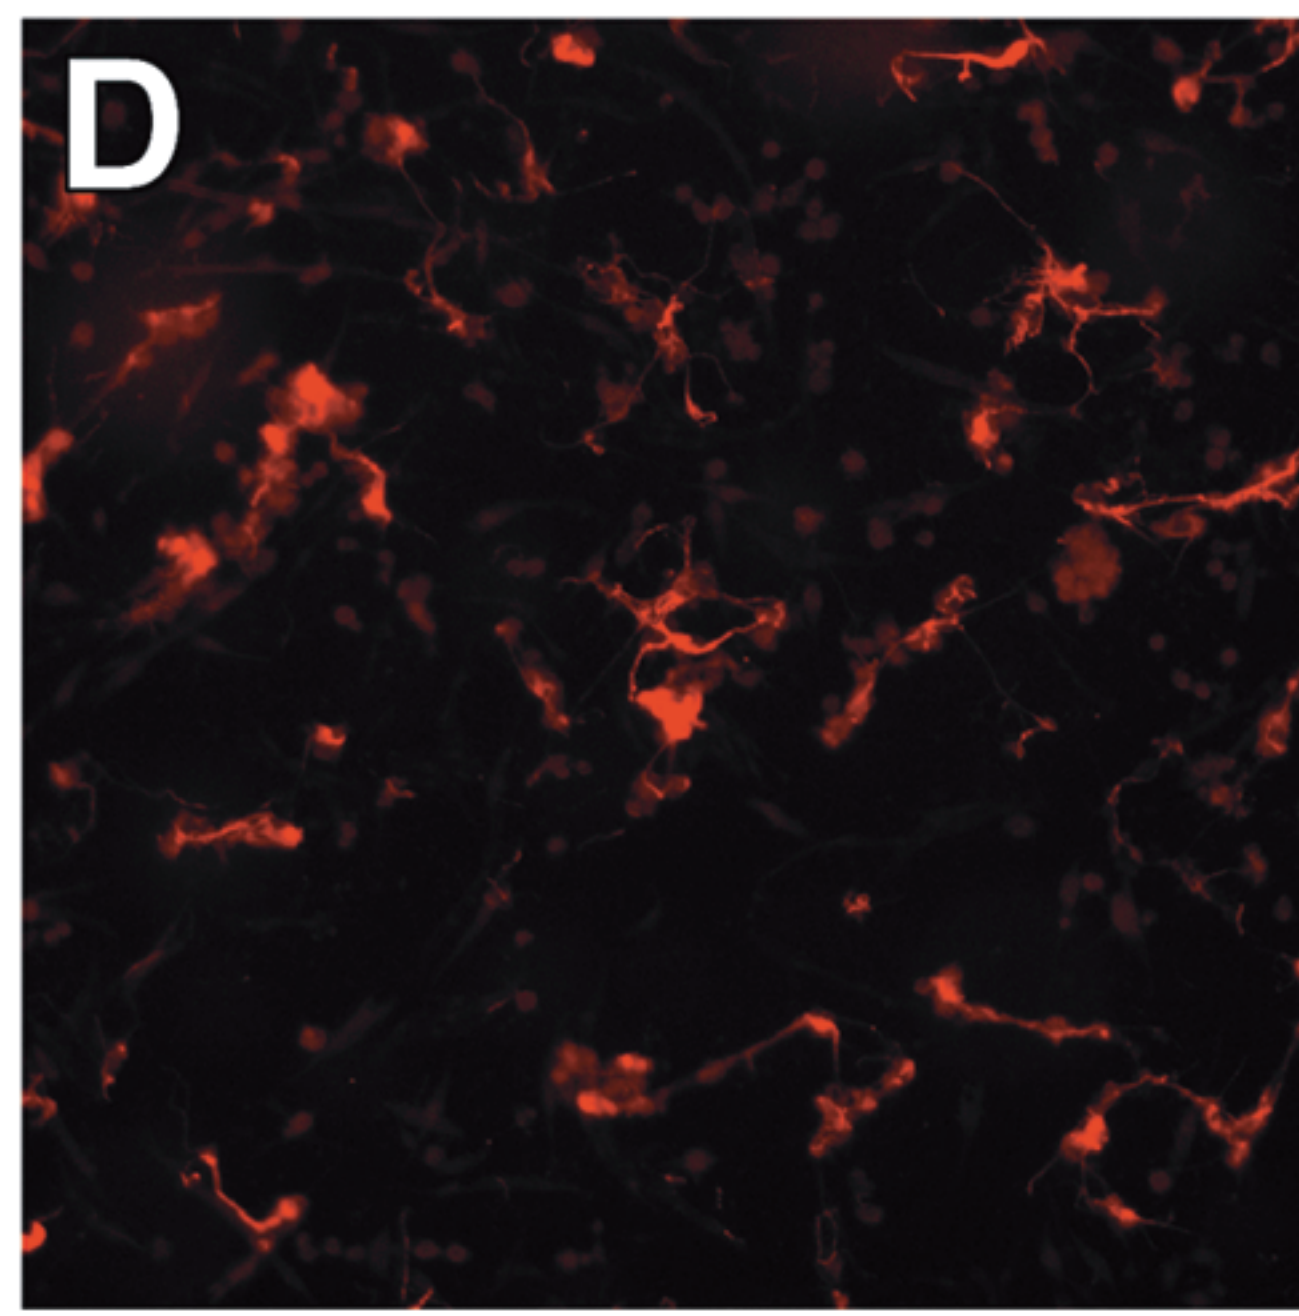

**Dichaete**

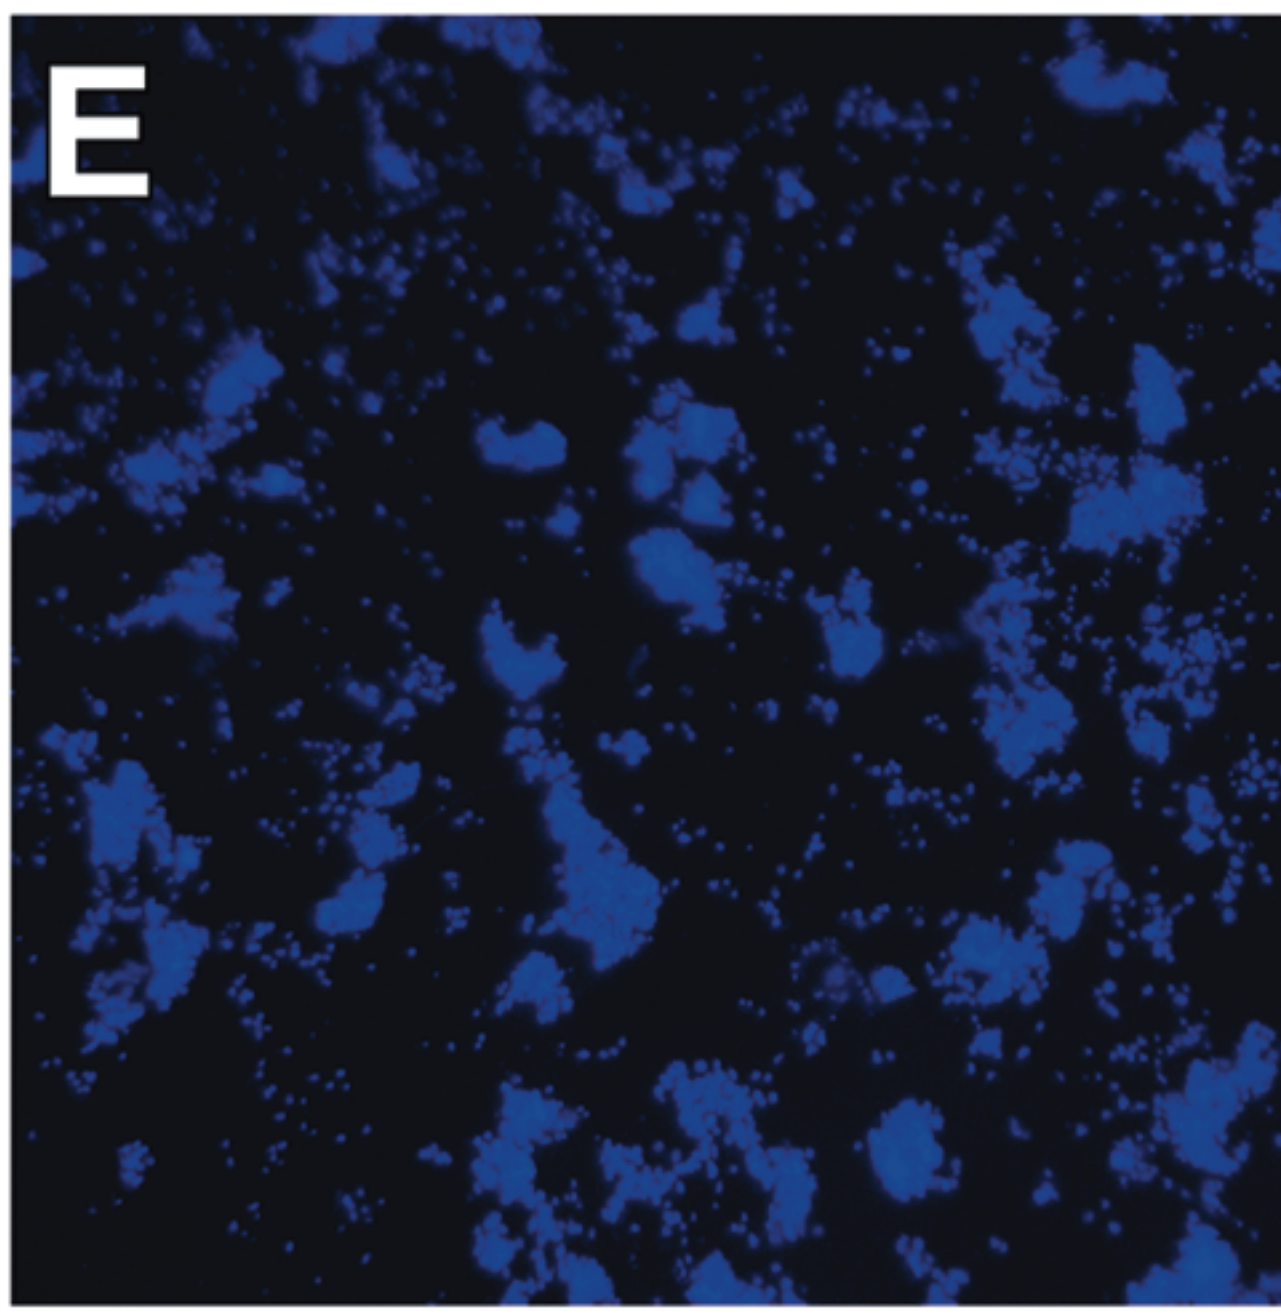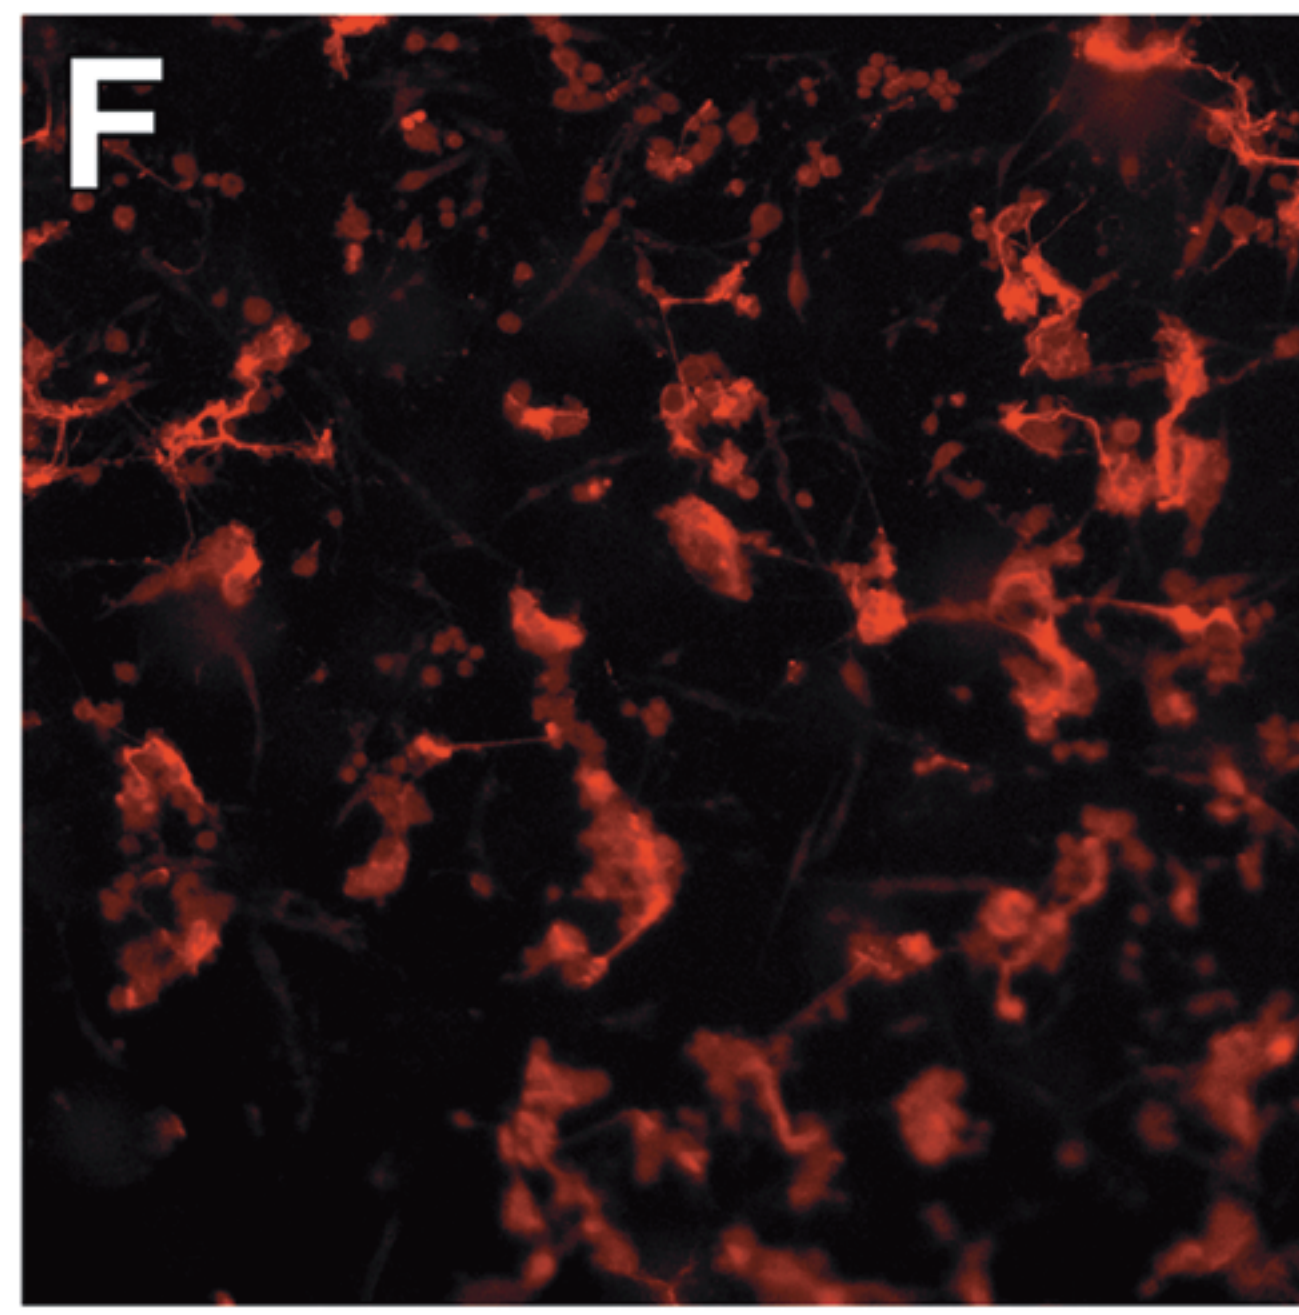

**Sox-N+Dichaete**

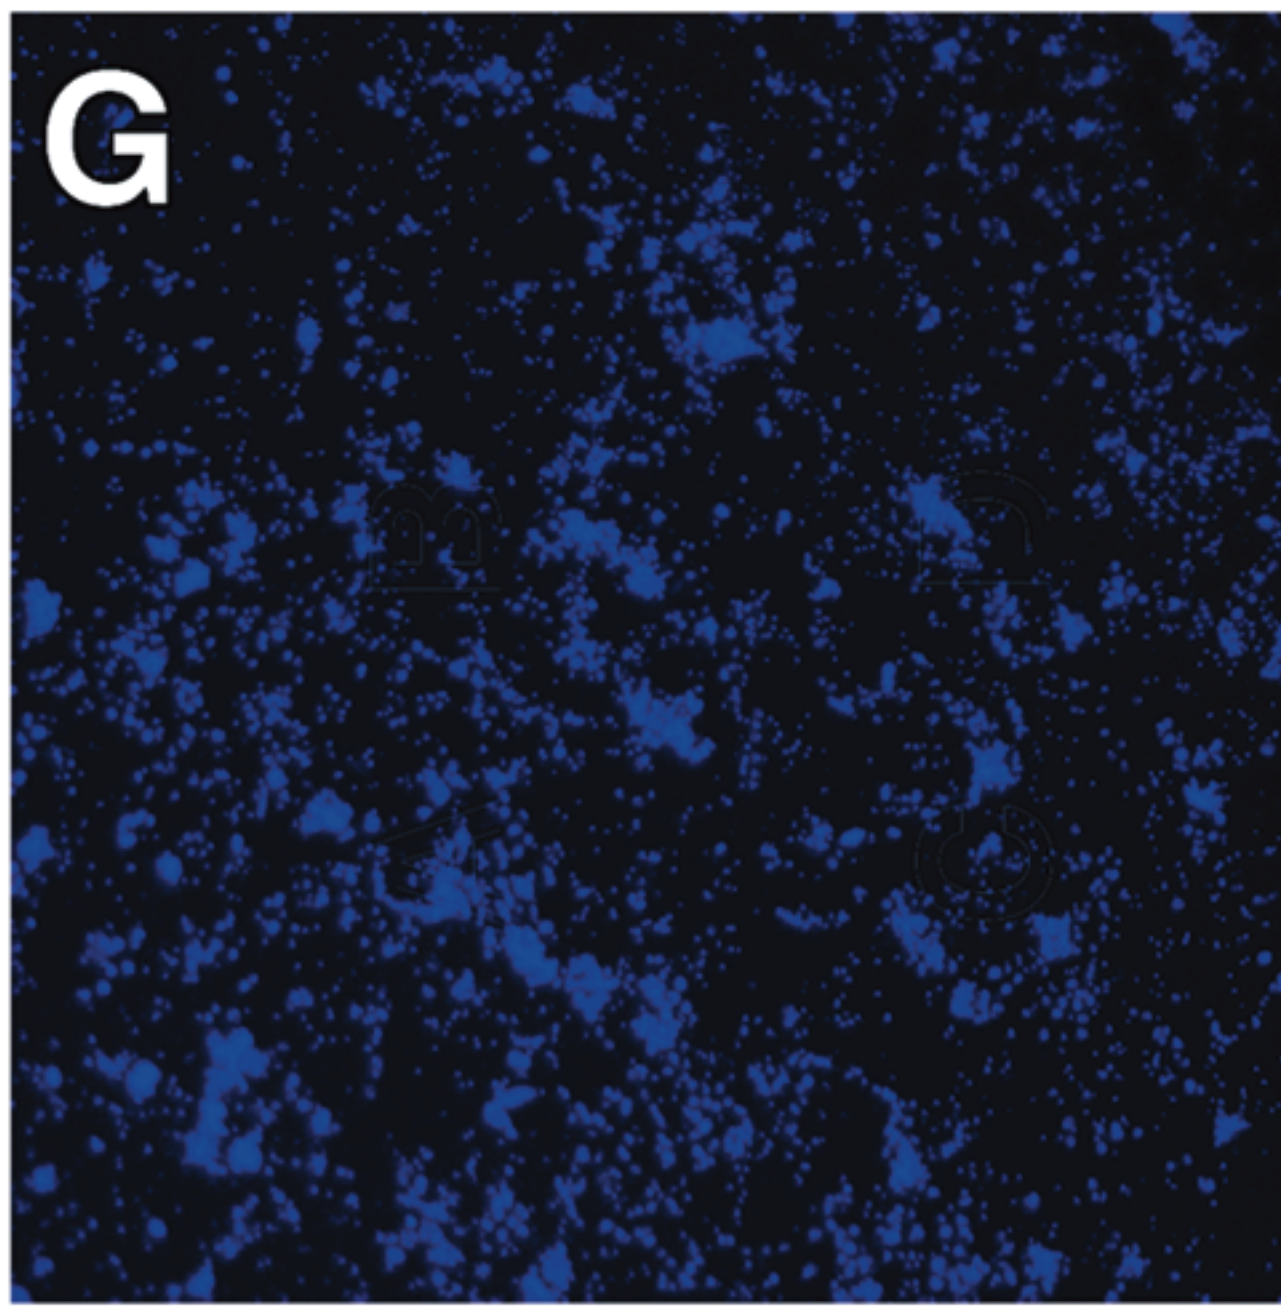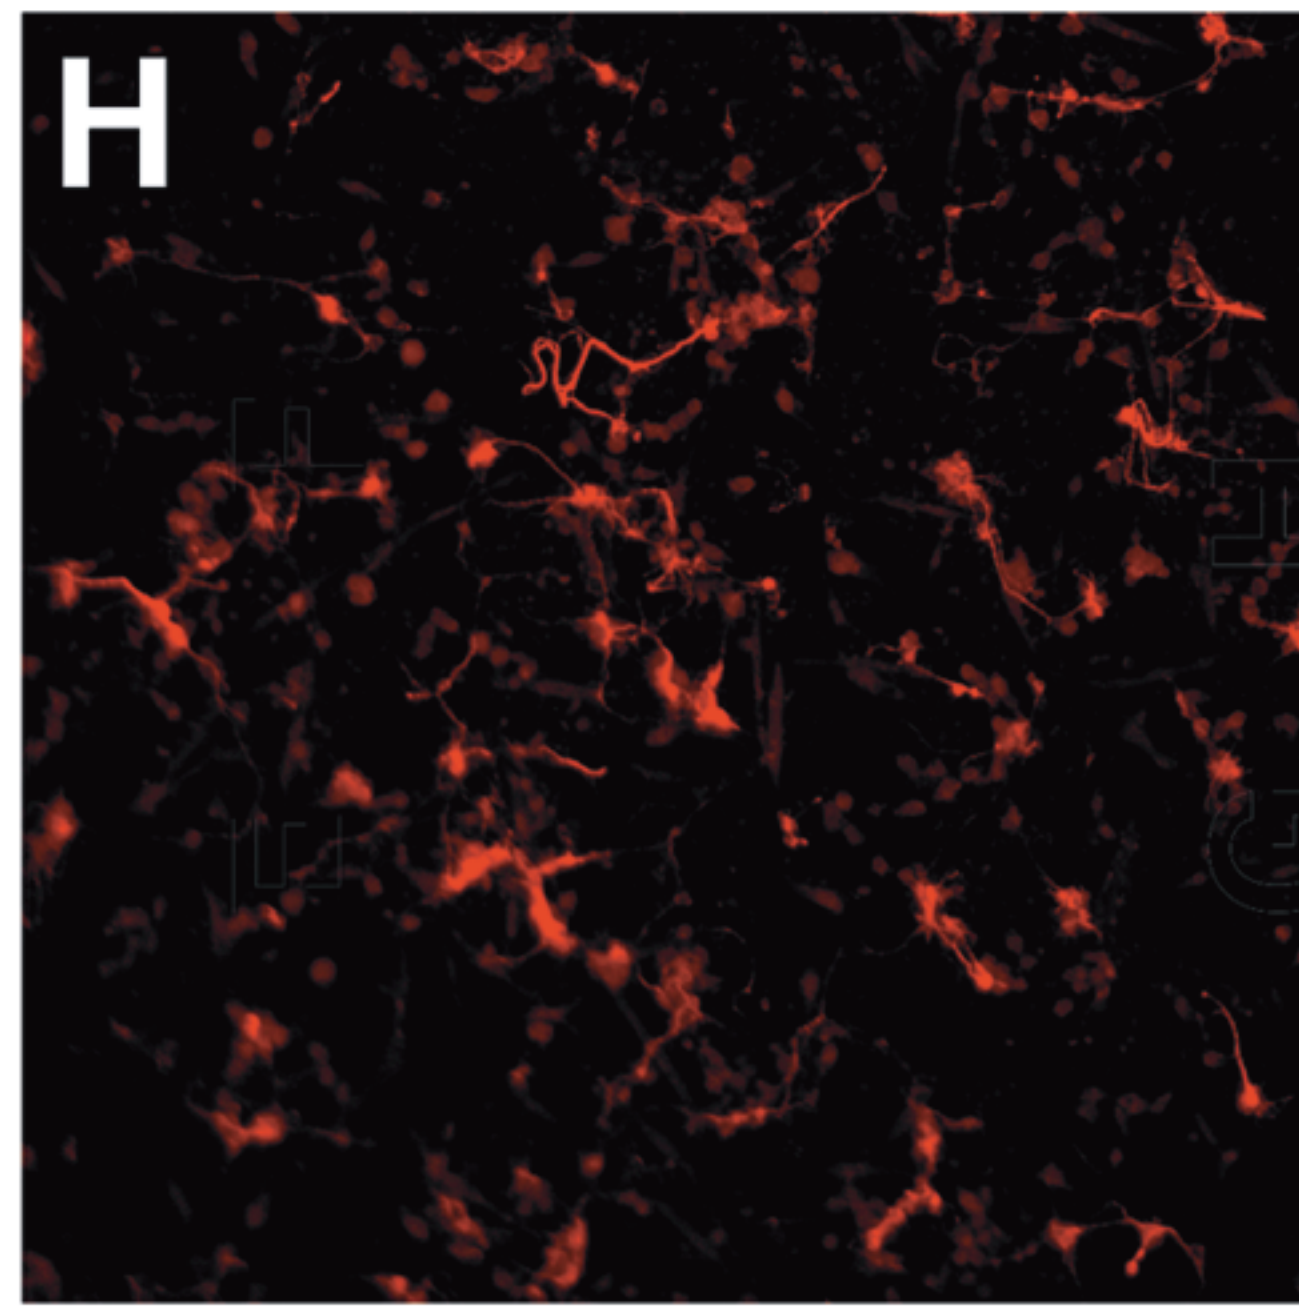

**Slit**

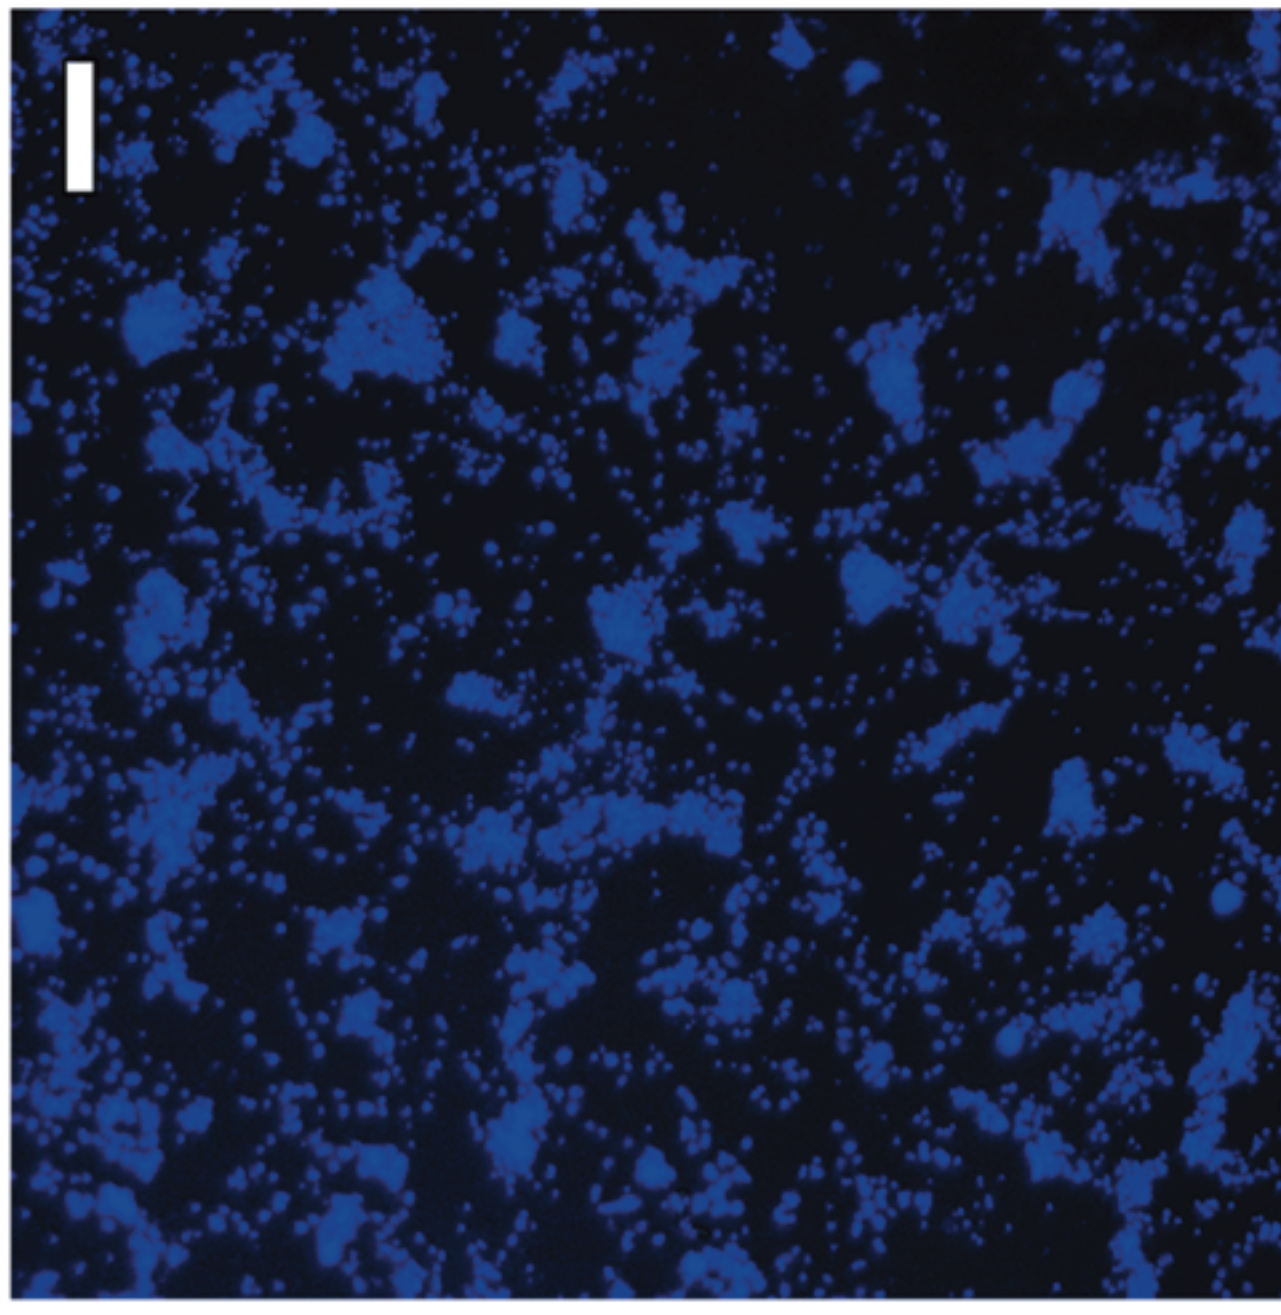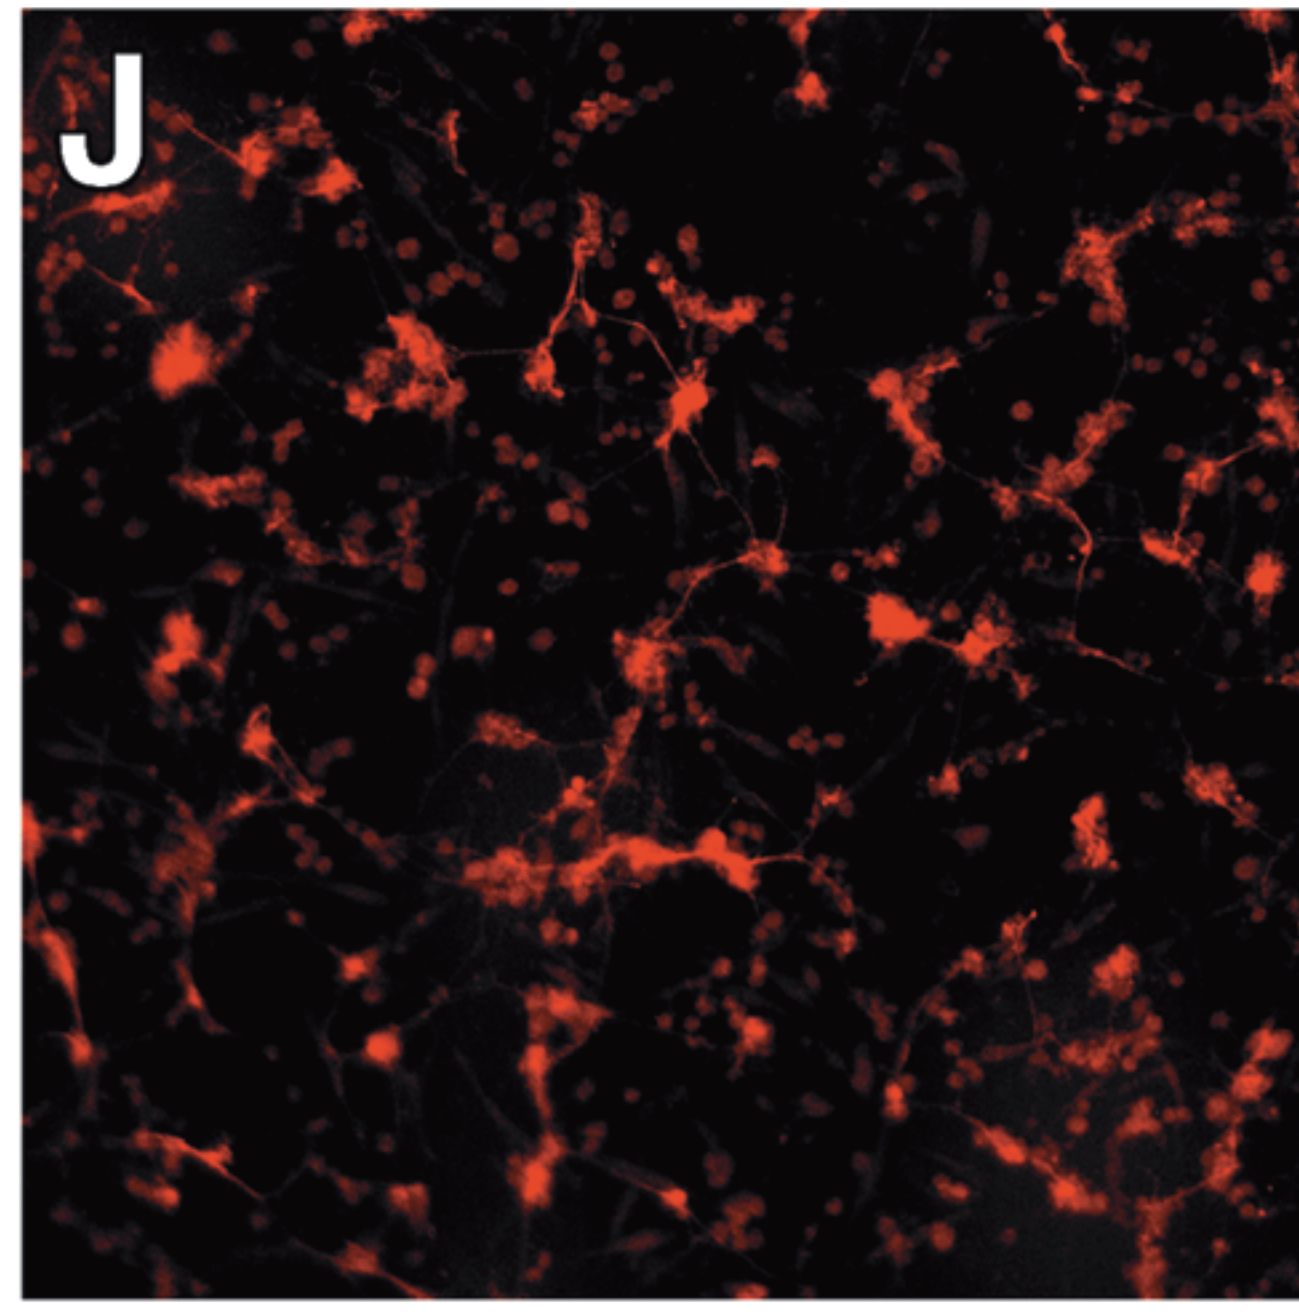

**Fra**

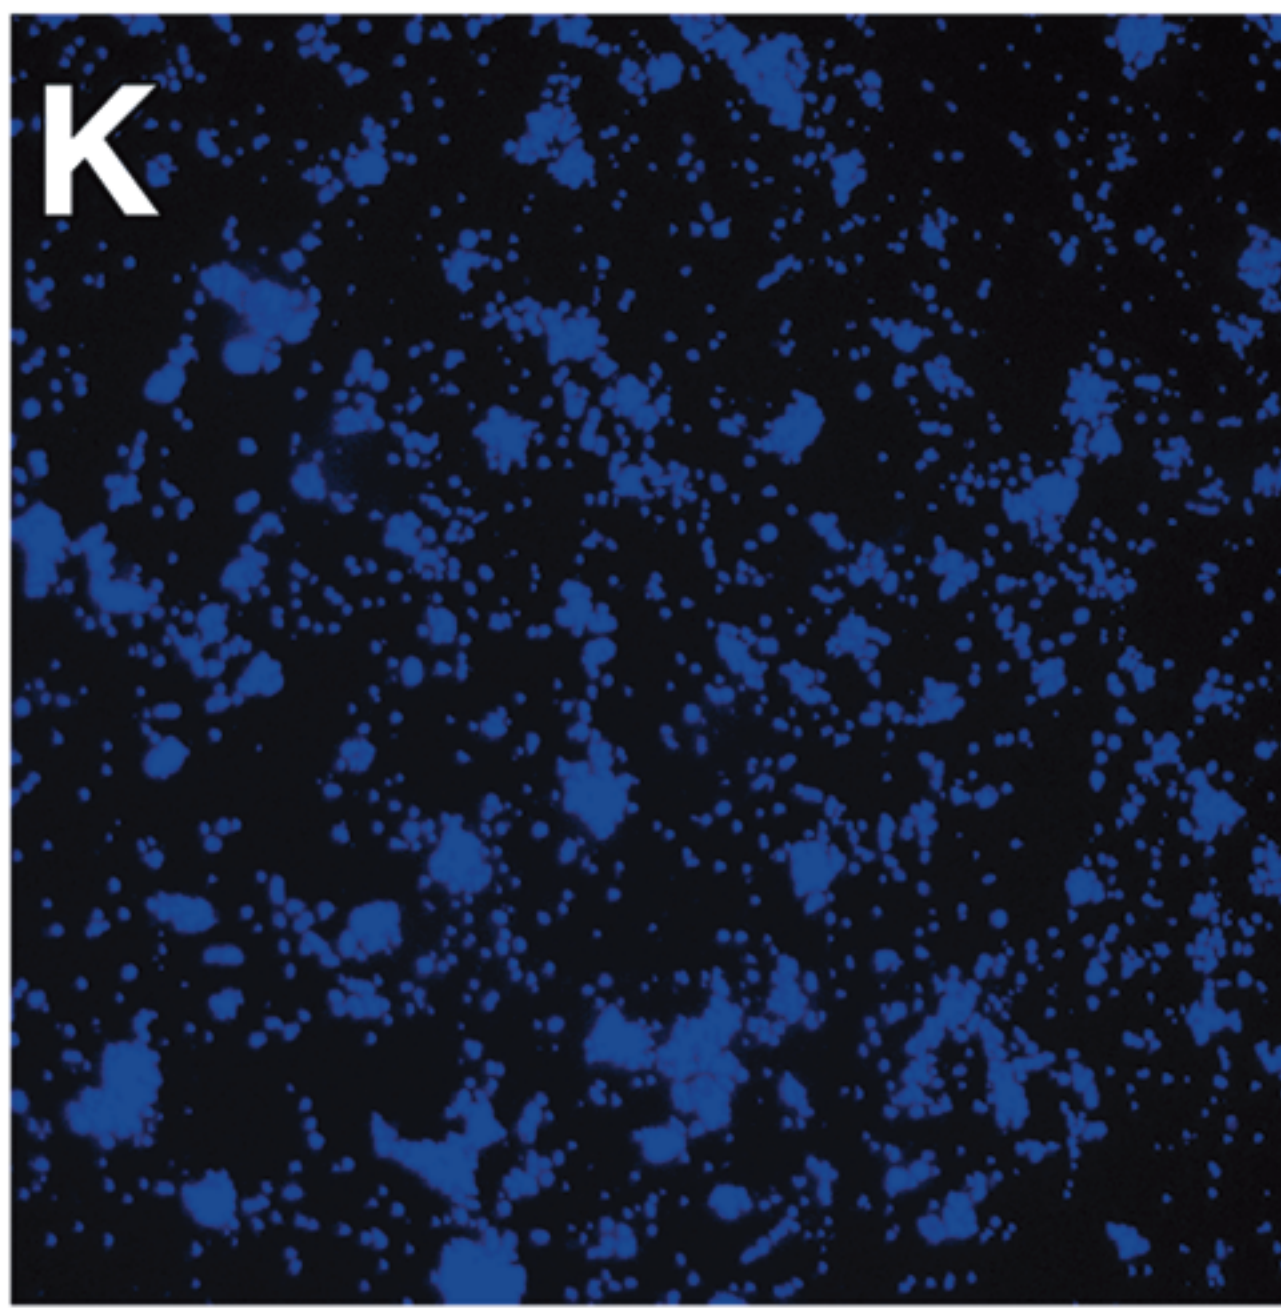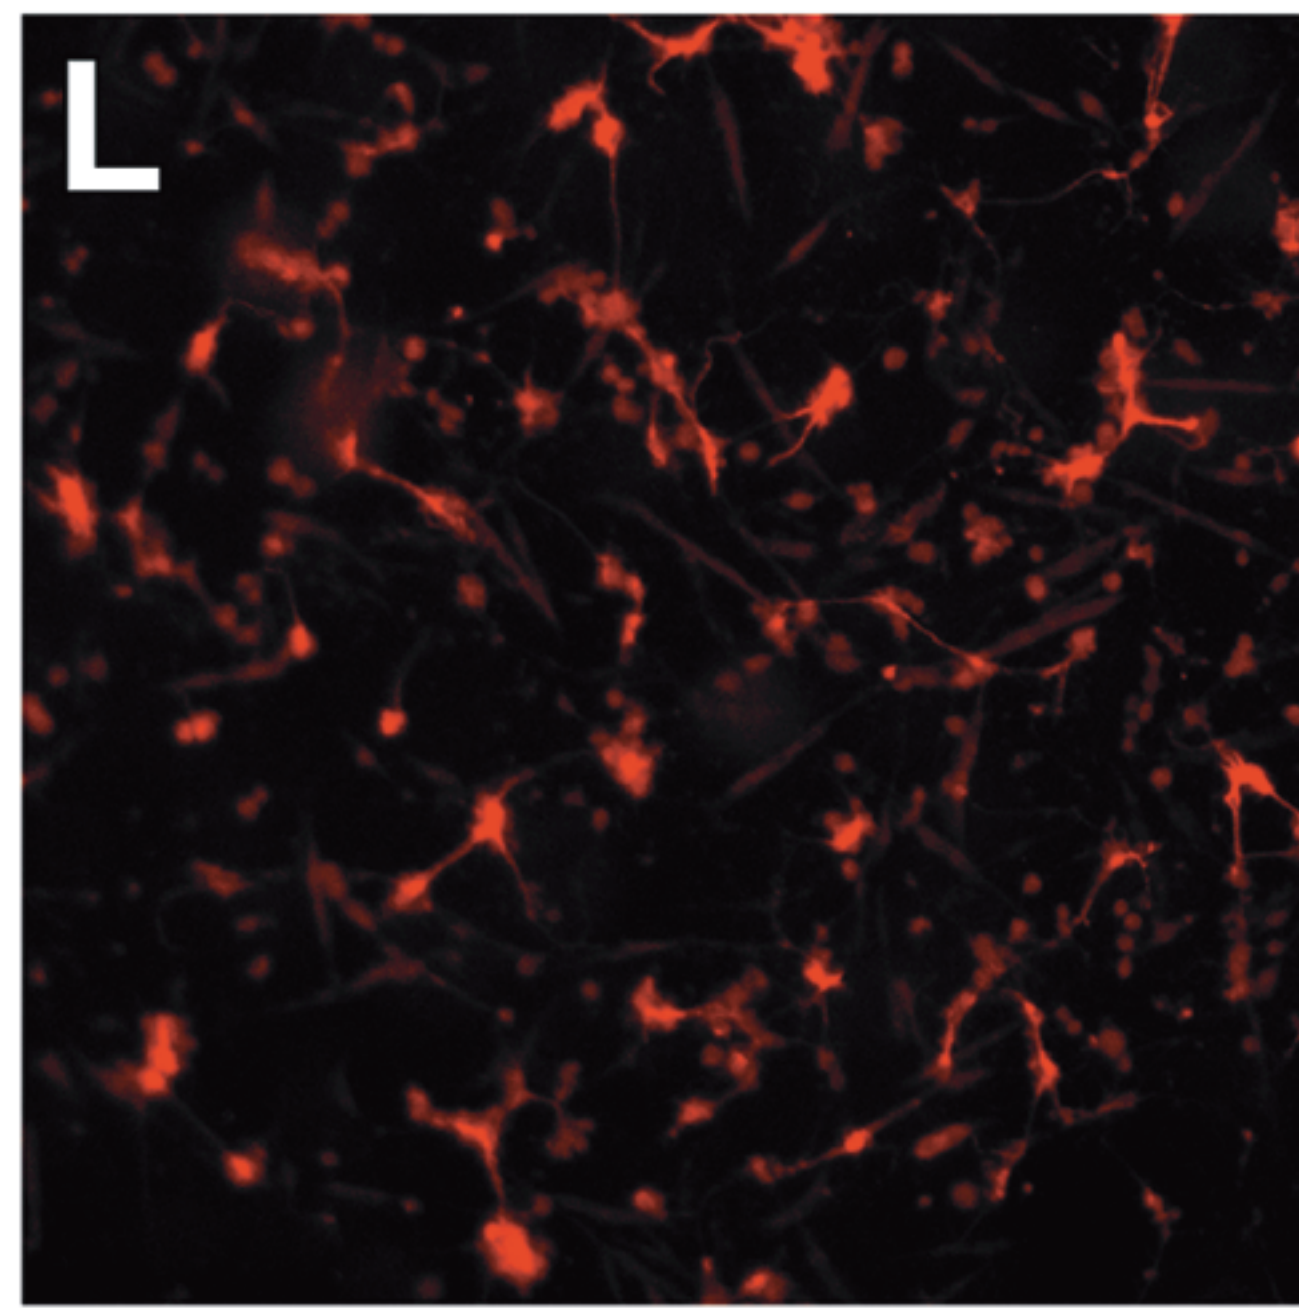

Supplement: pnas_0704299104_1.pdf [file pnas_0704299104_1.pdf]
